# Supplementary material
Source: PubMed Central journal article supplement (PMC7726696)

## Supplemental Online Content

Chew DP, Hyun K, Morton E, et al. Objective risk assessment vs standard care for acute coronary syndromes: a randomized clinical trial. *JAMA Cardiol*. Published online December 9, 2020. doi:10.1001/jamacardio.2020.6314

**eFigure.** AGRIS worksheet

This supplemental material has been provided by the authors to give readers additional information about their work.

# Online Supplement eFigure 1: AGRIS worksheet

Hospital Name  
 AGRIS Study Worksheet Page 1

Please File in Medical Record

URN: 012345678  
**SURNAME**  
 First Name  
 DOB: 01/02/34

**Step 1:** Use the following table to calculate patient's GRACE Risk Score and CRUSADE Bleeding Risk Score

| Age (years)         | points  | Patient         | Base Hct% (points) | Patient |
|---------------------|---------|-----------------|--------------------|---------|
| <40                 | 0       |                 | <31                | 9       |
| 40-49               | 18      |                 | 31-33.9            | 7       |
| 50-59               | 36      |                 | 34-36.9            | 3       |
| 60-69               | 55      |                 | 37-39.9            | 2       |
| 70-79               | 73      |                 | >40                | 0       |
| 80+                 | 91      |                 |                    |         |
| HR (bpm)            | points  | Patient         | eGFR (ml/min)      | points  |
| <70                 | 0       |                 | ≤15                | 39      |
| 70-89               | 7       |                 | >15-30             | 35      |
| 90-109              | 13      |                 | >30-60             | 28      |
| 110-149             | 23      |                 | >60-90             | 17      |
| 150-199             | 36      |                 | >90-120            | 7       |
| >200                | 46      |                 | >120               | 0       |
| SBP (mmHg)          | points  | Patient         | Heart Rate (bpm)   | points  |
| <80                 | 63      |                 | ≤70                | 0       |
| 80-99               | 58      |                 | 71-80              | 1       |
| 100-119             | 47      |                 | 81-90              | 3       |
| 120-139             | 37      |                 | 91-100             | 6       |
| 140-159             | 26      |                 | 101-110            | 8       |
| 160-199             | 11      |                 | 111-120            | 10      |
| >200                | 0       |                 | >120               | 11      |
| Creatinine (umol/L) | points  | Patient         | SBP (mmHg)         | points  |
| 0-34                | 2       |                 | ≤90                | 10      |
| 35-70               | 5       |                 | 91-100             | 8       |
| 71-105              | 8       |                 | 101-120            | 5       |
| 106-140             | 11      |                 | 121-180            | 1       |
| 141-176             | 14      |                 | 181-200            | 3       |
| 177-353             | 23      |                 | >200               | 5       |
| ≥354                | 31      |                 |                    |         |
| Clinical points     | Patient | Clinical points | Female             | points  |
| Killip Class I      | 0       |                 | CCF                | 8       |
| Killip Class II     | 21      |                 | Vasc Disease       | 7       |
| Killip Class III    | 43      |                 | CRUSADE            |         |
| Killip Class IV     | 64      |                 |                    |         |
| ST Deviation        | 30      |                 |                    |         |
| Troponin (+)        | 15      |                 |                    |         |
| Cardiac Arrest      | 43      |                 |                    |         |
| <b>GRACE Score</b>  |         |                 |                    |         |

Notes on using scores:  
 • Use haemodynamic characteristics at the time of presentation  
 • Killip Class I= Clear lung fields,  
 • Killip Class II= Crepitations in lower ones  
 • Killip Class III= Creps in the Upper Zones  
 • Killip Class IV: Pulmonary Oedema or Cardiogenic Shock  
 • ST deviation= ST elevation or Depression >1mm  
 • STEMI and NSTEMI in Bleeding score are mutually exclusive. Score STEMI if there is any ST elevation.

**Step 2:** Use the nomograms below to estimate the patient specific risk and estimated benefit from guideline recommended therapies

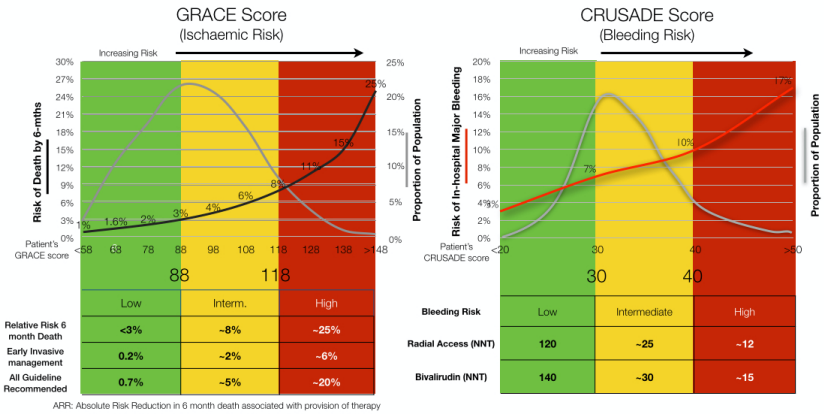

The GRACE Score is: .....  
 The Risk Strata is: **Low (≤88)**  
**Intermediate (89-118)**  
**High (>118)**

The CRUSADE Score is: .....  
 The Risk Strata is: **Low (≤30)**  
**Intermediate (31-40)**  
**High (>40)**

Hamm CW, Bassand JP, Agewall S, et al. ESC Guidelines for the management of acute coronary syndromes in patients presenting without persistent ST-segment elevation. European Heart Journal. 2011;32:2999-3054.  
 Fox KAA, Dabbous OH, Goldberg RJ, et al. Prediction of risk of death and myocardial infarction in the six months after presentation with acute coronary syndrome: prospective multinational observational study (GRACE). BMJ. 2006;333:1091-1091.  
 Subramanian S, Bach RG, Chen AV, et al. Baseline Risk of Major Bleeding in Non-ST-Segment-Elevation Myocardial Infarction: The CRUSADE (Can Rapid risk stratification of Unstable angina patients Suppress Adverse outcomes with Early implementation of the ACC/AHA guidelines) Bleeding Score. Circulation. 2009;119:1873-1882.

Hospital Name  
 AGRIS Study Worksheet Page 2

URN: 012345678  
**SURNAME**  
 First Name  
 DOB: 01/02/34

**Step 3:** Specific recommendations to consider based on scores

**Step 4:** Confirm intended therapies

Please tick (✓) intended utilisation for guideline recommendations below

| LOW                                     | INTERMEDIATE                               | HIGH                                       | Commentary                                                                                                                                   | Intended | Not Intended | Contra-indicated; (Please state reason) |
|-----------------------------------------|--------------------------------------------|--------------------------------------------|----------------------------------------------------------------------------------------------------------------------------------------------|----------|--------------|-----------------------------------------|
| Aspirin                                 | Aspirin                                    | Aspirin                                    | Unless contraindicated, allergy, high bleeding risk                                                                                          |          |              |                                         |
| Ischaemia testing                       |                                            |                                            | Reserve for low risk                                                                                                                         |          |              |                                         |
|                                         | Clopidogrel or Ticagrelor with aspirin     | Clopidogrel or Ticagrelor with aspirin     | Initiate soon after establishing diagnosis                                                                                                   |          |              |                                         |
|                                         | Prasugrel with aspirin                     | Prasugrel with aspirin                     | May consider in Primary PCI for STEMI, and NSTEMI/ACS for undergoing PCI                                                                     |          |              |                                         |
|                                         | Low molecular weight heparin or UF heparin | Low molecular weight heparin or UF heparin | Consider in patients with biomarker elevation and/or dynamic ECG changes                                                                     |          |              |                                         |
|                                         | Coronary Angiography                       | Coronary Angiography                       | If Intermediate risk (GRS>89) and no contra-indication to coronary angiography, consider angiography within 96 hours (NICE guidance)         |          |              |                                         |
|                                         |                                            | Coronary Angiography within 24 hours       | If very high risk (GRS>140) and no contra-indication to coronary angiography, consider angiography within 24hours of admission               |          |              |                                         |
|                                         | Bivalirudin                                | Bivalirudin                                | For patients undergoing coronary angiography if at high risk of bleeding                                                                     |          |              |                                         |
|                                         |                                            | Glycoprotein IIb/IIIa inhibitors           | Consider at the time of PCI, but balance against bleeding risk                                                                               |          |              |                                         |
| Assessment of left ventricular function | Assessment of left ventricular function    | Assessment of left ventricular function    | All patients unless recently performed                                                                                                       |          |              |                                         |
| ACE inhibitor/ARB                       | ACE inhibitor/ARB                          | ACE inhibitor/ARB                          | Indicated in Hypertension, Diabetes, LV dysfunction                                                                                          |          |              |                                         |
| B Blockers                              | B Blockers                                 | B Blockers                                 | Indicated in all MI, UA with LV dysfunction                                                                                                  |          |              |                                         |
| Statins                                 | Statins                                    | Statins                                    | All patients unless not tolerated                                                                                                            |          |              |                                         |
| Cardiac rehabilitation                  | Cardiac rehabilitation                     | Cardiac rehabilitation                     | Give advice on follow-up, management of cardiovascular risk factors, management/information concerning their medications, life style changes |          |              |                                         |

Signature (Medical): .....  
 Role: ..... Date: .....

Signature (Nursing): .....  
 Role: ..... Date: .....

## Supplementary Figure 3: Duration of site recruitment among hospitals randomized to Active (Implementation of GRACE risk scoring) and Control

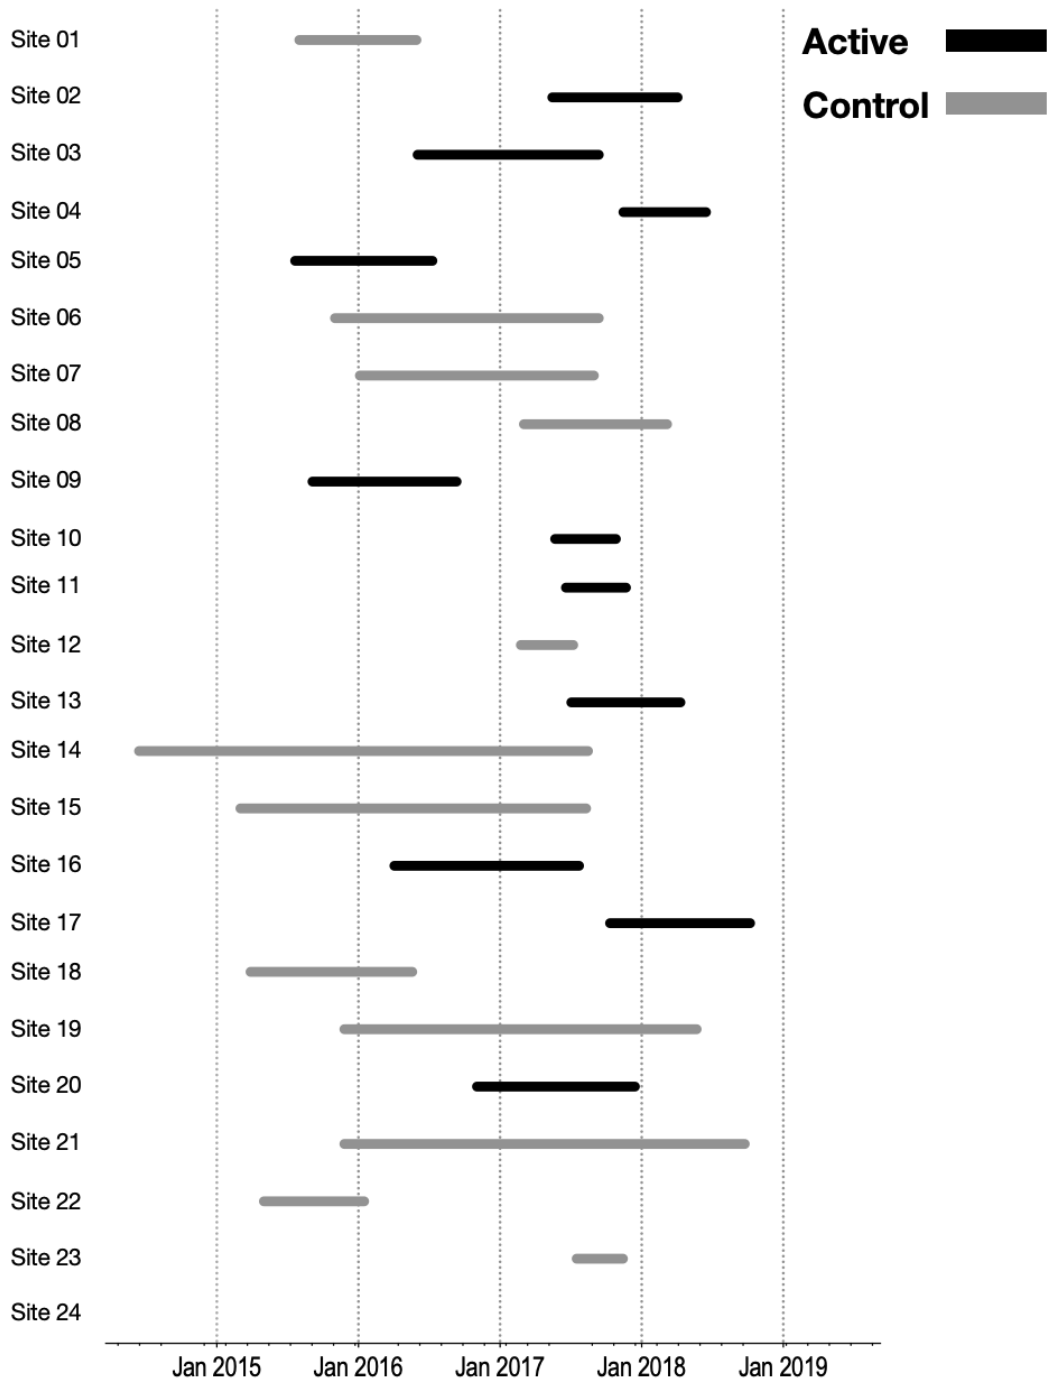

Supplement: jamacardiol-e206314-s002.pdf [file jamacardiol-e206314-s002.pdf]
