# Supplementary material
Source: PubMed Central journal article supplement (PMC7726696)
Supplement: jamacardiol-e206314-s003.pdf [file jamacardiol-e206314-s003.pdf]

## Data Sharing Statement

Chew. Objective Risk Assessment vs Standard Care for Acute Coronary Syndromes. *JAMA Cardiol.* Published December 09, 2020. 10.1001/jamacardio.2020.6314

### Data

**Data available:** Yes

**Data types:** Deidentified participant data

**How to access data:** [Derek.chew@flinders.edu.au](mailto:Derek.chew@flinders.edu.au)

**When available:** beginning date: 07-01-2021, end date: 07-01-2022

### Supporting Documents

**Document types:** None

### Additional Information

**Who can access the data:** Researchers whose proposed use of the data has been approved

**Types of analyses:** Meta-analysis

**Mechanisms of data availability:** after approval of proposal

**Any additional restrictions:** none
